# Supplementary material
Source: Research Square preprint supplement (doi:10.21203/rs.3.rs-9227413/v1)
Supplement: Supplementary file 1 [file e417aa77140462a4a894bdaa.docx]

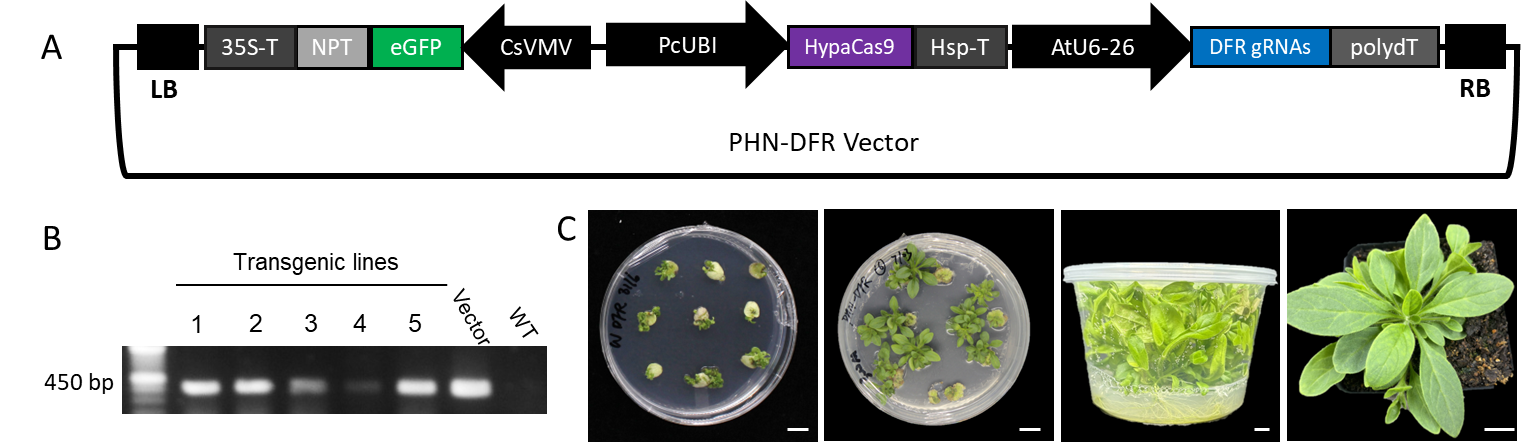


**Supplementary Fig. 1. CRISPR/Cas9-mediated editing of the DFR gene in *Petunia × hybrida* ‘Carmine Velour’. (A)** Schematic diagram of the CRISPR/Cas9 construct used for gene editing. The binary vector includes: a neomycin phosphotransferase (NPT) selectable marker fused with an enhanced green fluorescent protein (eGFP) reporter driven by the 35S promoter; a codon-optimized HypaCas9 driven by the *Petroselinum crispum* ubiquitin promoter (PcUBI) with a CsVMV enhancer; and a gRNA cassette targeting the *DFR* gene under the control of the AtU6-26 promoter. **(B)** PCR-based validation of transgene insertion by amplification of the GFP fragment. A 450-bp GFP-specific band was detected in transgenic lines 1–5 and the vector positive control, but not in the wild-type (WT) negative control. **(C)** Regeneration workflow of gene-edited plants. From left to right: callus formation on selection medium, shoot regeneration, shoot proliferation in tissue culture, and an acclimatized edited plant growing in soil. Scale bars, 1 cm.


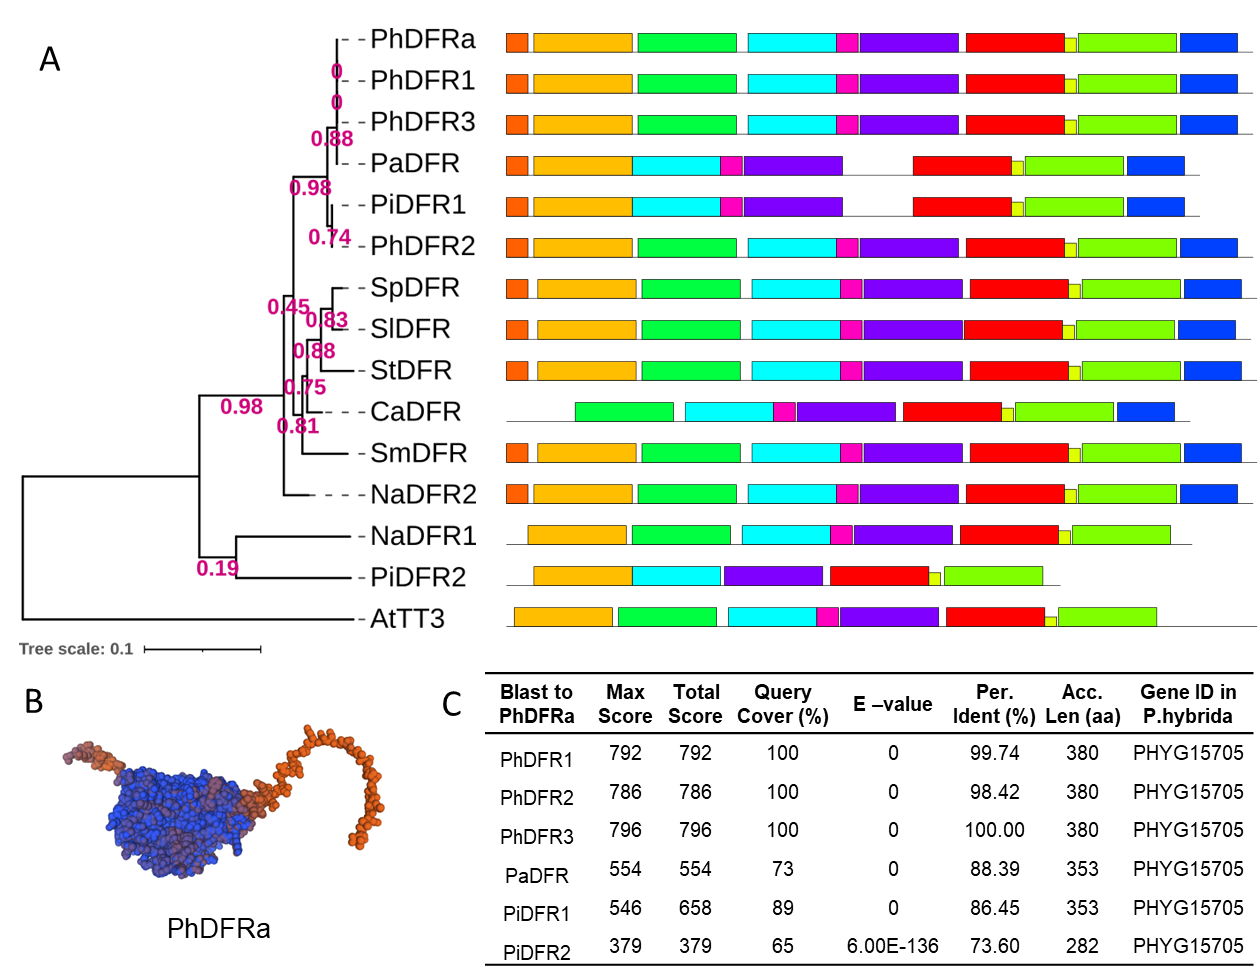


**Supplementary Fig. 2. Phylogenetic and structural analysis of DFR homologs associated with anthocyanin biosynthesis.** (**A**) Phylogenetic tree of *DFR* proteins reported to function in anthocyanin biosynthesis across representative species, including multiple annotated *DFR*-like sequences from *Petunia*. The tree highlights the relationship among petunia *DFR* homologs and places the anthocyanin-related petunia *DFR* within the broader evolutionary context of characterized *DFR* proteins. Bootstrap support values are indicated at major nodes. (**B**) Predicted three-dimensional structure of the petunia DFR protein generated using SWISS-MODEL. The model illustrates the overall fold of the deduced DFR protein and supports its structural similarity to functionally characterized DFR enzymes involved in flavonoid biosynthesis. (**C**) Domain architecture and sequence comparison of petunia *DFR* candidates. All queried petunia *DFR* versions showed the highest similarity to PhDFR in BLAST analysis, indicating that these sequences correspond to the same anthocyanin-associated *DFR* homolog. Combined with the phylogenetic analysis, these results support the conclusion that *Petunia hybrida* contains a major DFR copy associated with anthocyanin biosynthesis.

**
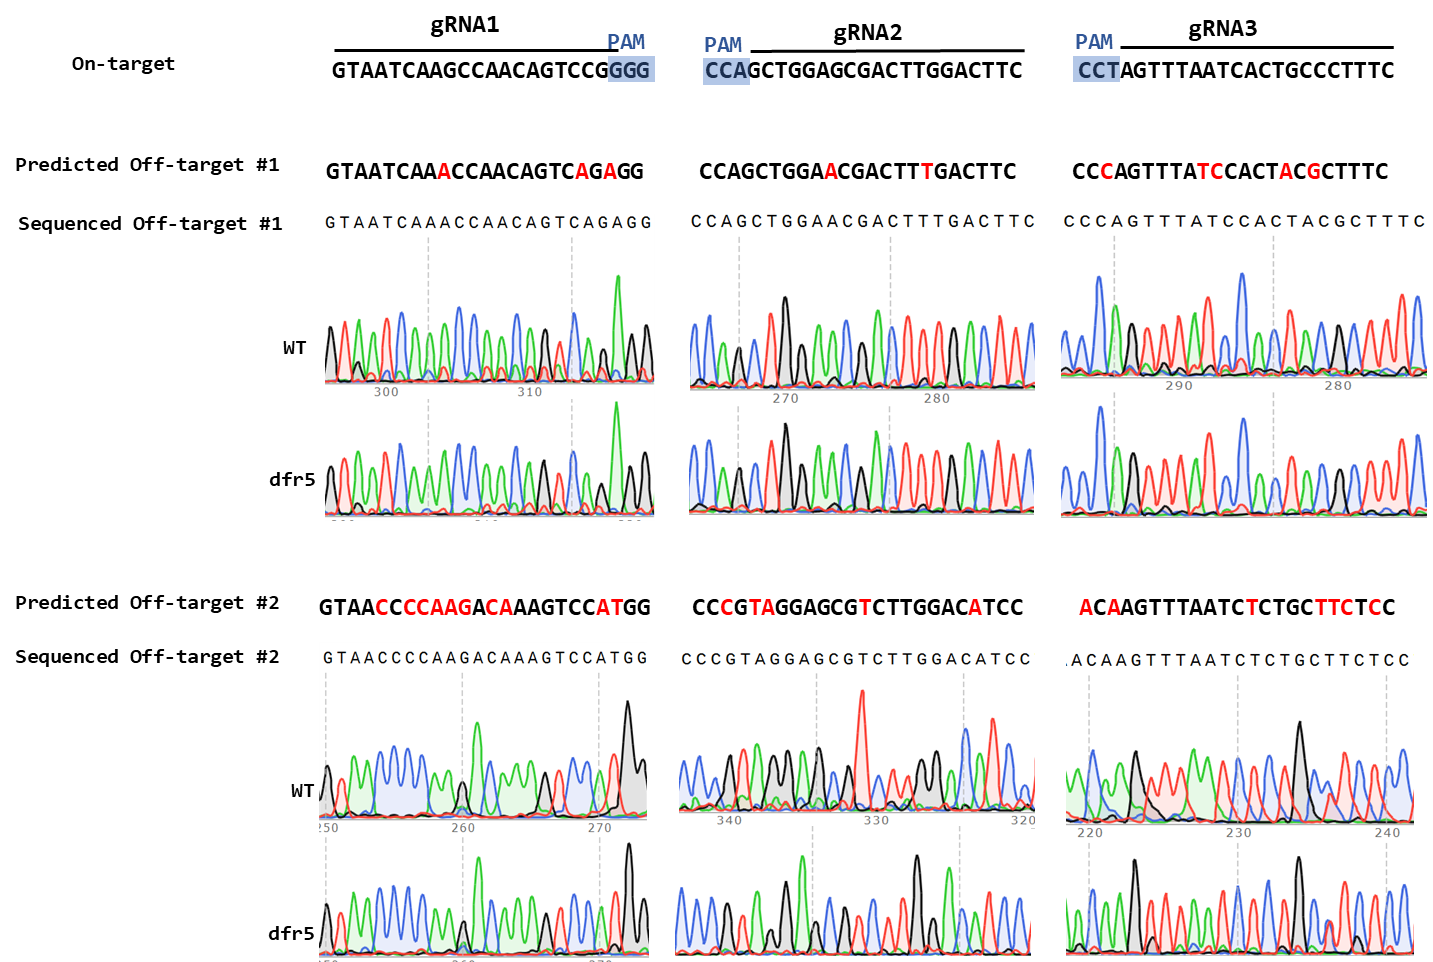
**

**Supplementary Fig. 3. Sequencing analysis of predicted off-target sites for the three guide RNAs targeting *DFR* in *Petunia × hybrida* ‘Carmine Velour’.** Two candidate off-target sites are shown for each of gRNA1, gRNA2, and gRNA3. Candidate loci were predicted using CRISPOR based on the available *P. inflata* and *P. axillaris* reference genomes, because no complete P. hybrida reference genome was available. The two predicted loci for gRNA1 were Peinf101Scf00590:2126655–2126677 (off-target #1) and Peaxi162Scf01392:26433–26455 (off-target #2); for gRNA2, Peinf101Ctg13770592:3665-3687 (off-target #1) and Peaxi162Scf00016:2363429-2363451 (off-target #2); and for gRNA3, Peinf101Scf00071:1456734–1456756 (off-target #1) and Peaxi162Scf00720:106168–106190 (off-target #2). For each candidate site, the predicted off-target sequence is aligned with the corresponding gRNA target sequence, with mismatched nucleotides highlighted in red and PAM sequences highlighted in blue. Representative Sanger sequencing chromatograms of PCR amplicons from wild type (WT) and the edited line dfr-5 are shown below each candidate locus. No sequence differences were detected between WT and dfr-5 at any of the examined loci, indicating no detectable off-target editing under the conditions tested.


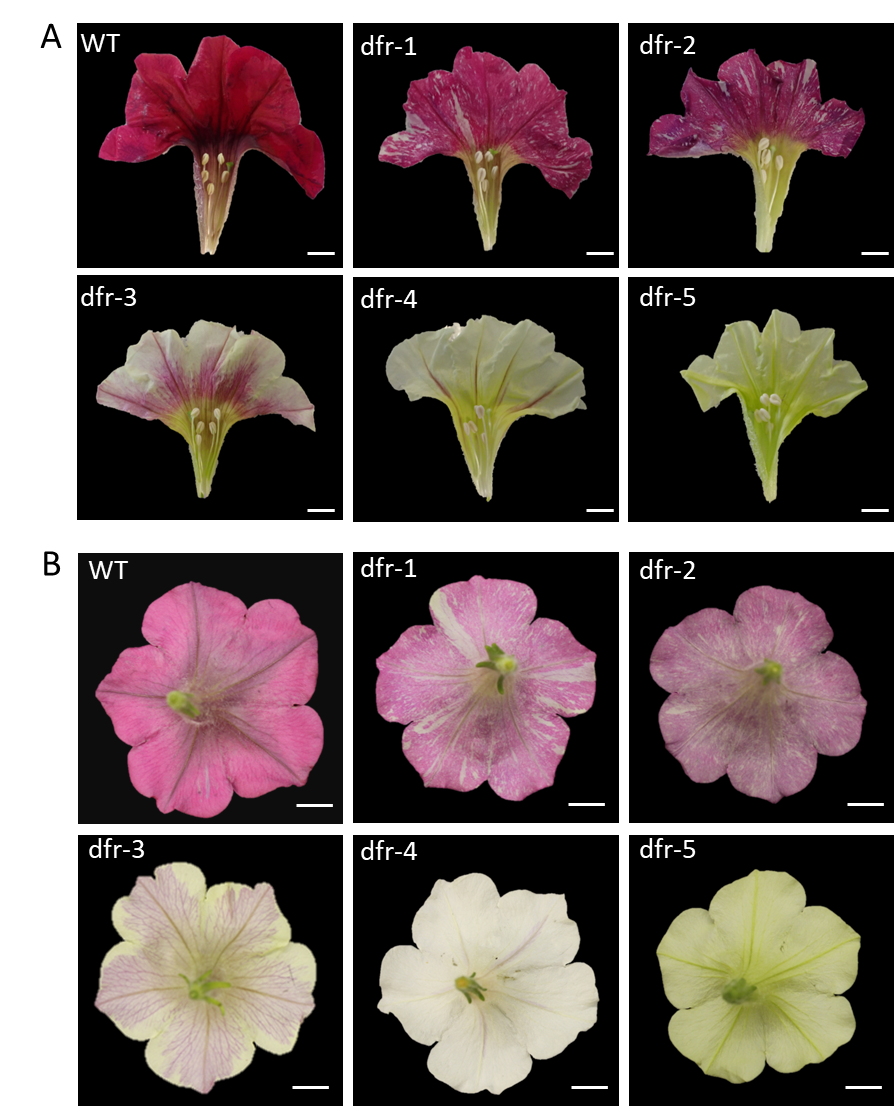


**Supplementary Fig. 4. *DFR* editing leads to a range of anthocyanin pigmentation loss in *Petunia × hybrida* ‘Carmine Velour’ flowers.(A)** Dissected flower corollas showing the adaxial (inner) surface from wild-type (WT) and *DFR*-edited lines (*dfr-1* to *dfr-5*). **(B)** View of intact flowers from the abaxial (outer) side, displaying pigmentation patterns on the reverse surface of the corolla. Reduced anthocyanin pigmentation is observed across the edited lines relative to WT, consistent with altered anthocyanin biosynthesis. Scale bars = 1 cm.

**
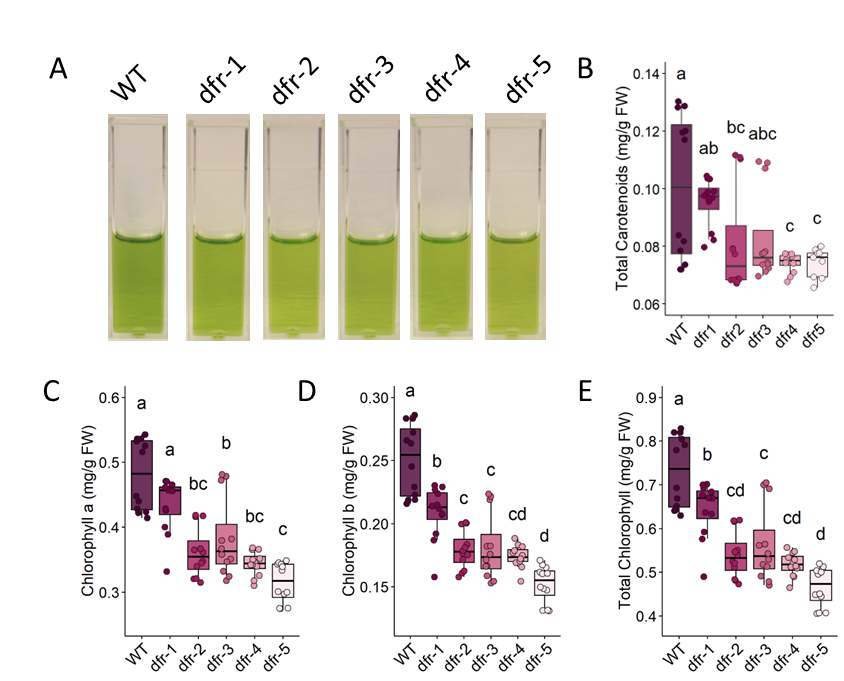
**

**Supplementary Fig. 5. Leaf carotenoid and chlorophyll contents in petunia WT and *dfr* mutant lines. (A)** Carotenoid extracts from leaves of wild-type (WT) and *dfr* mutants (*dfr-1* to *dfr-5*) displayed yellow-green coloration. **(B)**Total carotenoid content (mg g⁻¹ FW). WT accumulated the highest carotenoid levels, whereas all *dfr* mutants exhibited reduced carotenoid content, with *dfr-4* and *dfr-5* showing the lowest levels. **(C)** Chlorophyll *a* content (mg g⁻¹ FW). All *dfr* mutants displayed significantly reduced chlorophyll relative to WT, with *dfr-5* showing the greatest reduction. **(D)** Chlorophyll *b* content (mg g⁻¹ FW). Chlorophyll b followed a similar trend, with each *dfr* line accumulating significantly less than WT, and *dfr-5* exhibiting the lowest levels. **(E)** Total chlorophyll (mg g⁻¹ FW). Consistent with the decreases observed for chlorophyll *a* and *b*, total chlorophyll content was significantly reduced in all *dfr* mutants compared with WT. For panels (B-E), each point represents one plotted measurement obtained from at least three biological replicates. Box plots show the median, interquartile range, and full data distribution. Statistical significance was assessed using one-way ANOVA followed by Tukey’s HSD test; different letters indicate significant differences among genotypes (*P* < 0.05).


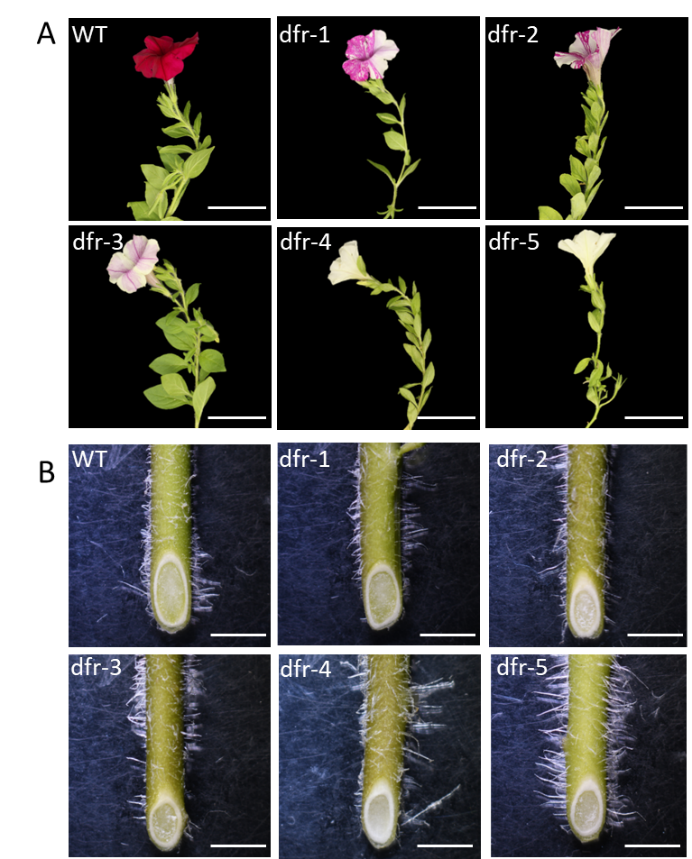


**Supplementary Fig. 6. *DFR* knockout alters floral pigmentation, but stem morphology and cross-sectional anatomy remain unaffected. (A)** Representative lateral views of flowering shoots from WT and *dfr* mutants (*dfr-1* to *dfr-5*). Floral pigmentation is reduced to varying extents across the mutants relative to WT, consistent with graded loss of DFR-mediated anthocyanin biosynthesis. In contrast, overall shoot architecture, internode length, and leaf morphology remain comparable across genotypes. Scale bars, 5 cm. **(B)** Transverse sections of young stems show indistinguishable anatomy among WT and all *dfr* mutants. Vascular organization, cortical thickness, and overall stem diameter are unaffected by DFR disruption. Images captured under a stereomicroscope. Scale bars, 5 mm.

**Supplementary Table 1. Primer sequences used in this study.**

| Primer name | Forward primer sequence (5'-3') | Reverse primer sequence (5'-3') | Purpose |
| --- | --- | --- | --- |
| DFR-1 | GCTACTGTTCGTGATCCT | CCTTTATACATATCCTCCAAAGTG | Target region sequencing |
| DFR-2 | CTTGGCTTGTCATGAGAC | TCCAAATGCACATATTGACC |
| gRNA1-1 | CCTCTGTGCAATTACATATGTC | TGAAATCCAAGTCACTCC | Off-target validation |
| gRNA1-2 | CTCGGTCGTGTCAAATCAG | GTGTGCCAGTGTCATCGT |
| gRNA2-1 | GATTCCTAATGCTAGGTGGA | AGGCTGTCAAGGAGTATG |
| gRNA2-2 | CATCAATTTGCTAGGCAAG | TGCTGAGTATCCTTCTAGC |
| gRNA3-1 | GATGAGGATGGTGATGTGAA | ATAGGAAGTAACTAGTCCACAG |
| gRNA3-2 | AGTGCCTGCTAACCATAA | GTTCATATGGTTGACACTTG |
| F3’5’H_q | CCACCTAATGCAGGTGCCA | GGCACGAACATTTGCCCAATTC | qRT-PCR |
| CHIA_q | CTCGGTCGAGTTCTTTAGGGA | CAATTCTCCGCCACCTTCTC |
| CHSA_q | GCAGGCGCGATCATTATAGG | CGGAGATGGCCATCAATAGCAC |
| F3’H_q | GTTTCGACGCGTTCTTGACT | TCCCTCCATCATTATCCGCA |
| ANS_q | GCGCACTGACTTTCATCCTC | AATGGTGTCCCCTATGTGCA |
| FLS_q | TAGAGGCAGCTGGTGGTGA | GGAGGCCTTGGACTTCATTTGG |
| CHLH_q | GTTCTCTTGAGTTCATGCCAGG | GCATAACTCCTTCGTTTGGCAA |
| PORA_q | CCTGGCTGCATTGCAACA | CTTTGTTCCAGCTCCAGTAGAC |
| EF1α_q | CCTGGTCAAATTGGAAACGG | CAGATCGCCTGTCAATCTTGG |
| GFP | ACAAGTTCAGCGTGTCCG | TCACCTTGATGCCGTTCT | Transgene insertion validation |

This table lists the primer sequences used for target-region sequencing, off-target validation, qRT-PCR, and transgene-insertion validation. All sequences are shown in the 5′–3′ orientation.
